# Supplementary material for: Integrase-Controlled Excision of Metal-Resistance Genomic Islands in Acinetobacter baumannii
Source: Genes (Basel). 2018 Jul 20;9(7):366. doi: 10.3390/genes9070366 (PMC6070778; doi:10.3390/genes9070366)
Supplement: Supplementary file 1 [file genes-09-00366-s001.docx]

**Table S1.** List of primers.

| Name | Sequence (forward) | Sequence (Reverse) | comments |
| --- | --- | --- | --- |
| alx_UG08 | CTGCAGGTGATAGGCTTCACGGCCAA | TGGTACTTCAAGATCCCCAATTCGTAATAAAACCAT | UF of G08 with restriction site for allelic exchange |
| Alx_DG08 | GCTTTTGAAGCTAATTCGTAATGGCTGCATAAA | GTCGACTGCGGGCTATTTTTGGTAAGCTGG | DF of G08 with restriction site for allelic exchange |
| Gm | CGAATTAGCTTCAAAAGCGCTCTGA | CGAATTGGGGATCTTGAAGTTCCT | Amplification of FRT-gentamicin-FRT cassette |
| lam_F8 | CATGTACAACAAAGTGAGTACAACCTGTTGCT | AGCTGGCTCGGCATTAGGGATTTTTGC | SOE amplicon of UF+*aacC1* cassette +DF of G08 |
| 16S | ACTCCTACGGGNGGCNGCA | GTATTACCGCNNCTGCTGGCAC | 16S gene for qPCR |
| G08-exc | ATGTTTAGCTGCGTAAATCG | TTTGGTTGCTGGTGTGGACAA | G08 junction by qPCR |
| G08-circ | TTCAGAATAAGCTGGATAGC | TAAGCGTTAGGTGTTGGGTC | G08 excision by qPCR |
| G62-exc | AACAAATATGAACTAATTGC | TTGTTGAAGACTATTAATG | G62 junction by qPCR |
| G62-circ | CAAGACAACCTGCTTTTACG | CGATATGGTTTGTCTTGTGG | G62 excision by qPCR |
| G08-int-clon | CGAGAGCTCAATAAATGTTAAAAGATACC | GTGTGTCGACTTAAGTGACCTCCTCATGC | Cloning of G08int |
| G62_int_clon | AAAAGCTTATTGAGTATGGCAAAGCACCG | CTTTAACTGCATATGTAGGATGCCGACTG | Cloning of G62int |
| A424-DCO | TCGCCATAACCTATGCTGGC | CAACAACAGAAGCGGCAGCC | DCO G08 mutant check |
| 17978-DCO | GTCACGATTCACGAAGATGA | GCTGCCTGACGCATAATCAC | DCO G62 mutant check |
| AB57-int | ATGAAGTTGGGAGCGAATACGG | CCAAGATTCGGCACACCTTTC | Screening G08 int |
| 17978-int | CATCGATAA CGGTCTGGCATG | AAGTACCGGTGAAACGACAGC | Screening G62 int |
| PR3136/PR3137 | CGGGATCCAATGCAGGCAAGTTGATTCC | CGGGATCCCGTTCGGGTCTTTCATGTCT | Ori from pWH1266 for cloning into pWSK129 |
| LF-RS-G08 | CTGCAGGTGATAGGCTTCACGGCCAA | GTACTTCAAGATCCCCAATTCGTAATAAAACCATTG | LF G08 Mutant validation colony PCR |
| RF-RS-G08 | GCTTTTGAAGCTAATTCGTAATGGCTGCATAAA | GTCGACTGCGGGCTATTTTTGGTAAGCTGG | RF G08 Mutant validation colony PCR |
| LF-RS-G62 | CGAATTGGGGATCTTGAAGTACCTATTCCG | CGAATTAGCTTCAAAAGCGCTCTGAAGTTCC | LF G62 Mutant validation colony PCR |
| RF-RS-G62 | CATGTACAACAAAGTGAGTACAACCTGTTGCT | AGCTGGCTCGGCATTAGGGATTTTTGC | RF G62 Mutant validation colony PCR |
| Gm-S | CATTAAACTGCTCATTCCAG | TAAGGCATTTGGCCGCATTG | *aacC1* screening in SCO of allelic exchange |
| G08-S | TTAAAACCACAAGACAAACCTCAGCCC | CCATTGAAGCATAGAGCGTCCCAGTG | SCO screening in allelic exchange of G08 |
| G62-S | TCACCGAGGACTCCTTCTTC | GGCGCAATACGTCTGATCTC | SCO screening in allelic exchange of G62 |
| LF-08 | TGATGTTTCTATCGAATTAATGTCATG | AACTTAATCTTTAAAGTTATT GCTA | Cloning of UF in mini islands of G08 in pUC18 |
| RF-08 | AATAACTTTAAAGATTAAGTTACTG | ATCCTCTTTTAAAGTTTTGACTA | Cloning of DF in mini islands of G08 in pUC18 |
| LF-08 | AGTAGTCGATGATGAAATAGTTGATGC | CGCGTTAATTCCTGCTATGGTCC | Cloning of LF in mini islands of G62 in pUC18 |
| RF-62 | AAAAGCTTATTGAGTATGGCACTGC | CCTTTAACTGCATATGTAGGCCGGTA | Cloning of RF in mini islands of G62 in pUC18 |
| F/RG08int | CATTAATCTTTAAAGTTATTGCATC | GATAGTAAAAAGTCTTAATACTGACT | Cloning of G08 integrase gene into pUC18 |
| F/RG62int | CGAGTCGACAATAAATGTTAAAAGATACC | GTGTGGATCCTTAAGTGACCTCCTCATGC | Cloning of G62 integrase gene into pUC18 |
| EXC8-F/R | TGTTCTTGTCCTTTACTGTG | GAAGAGGGTAAATCTTCTCC | Detection of circular forms of G08 from chromosome |
| JUNC8-F/R | TAACGGTCAAAGGTAACGTG | ATCAATTCCACTACAGTTG | G08 target Junction from chromosome |
| EXC62-F/R | TGTTGTAGGAATATTACTCG | ATGCATATTCTTTTTACACC | Detection of circular forms of G62 from chromosome |
| JUNC62-F/R | AAATCGGAAGAACAGCCAGC | ATGAGAAGTCGGTAAGGGC | G62 target Junction from chromosome |
| PS-F/R | TTACCCAAGACTTCGCCTCT | CCCGATAACTCCATTCTTCG | Loss of pJTOOL-3 backbone |
| 2LF-08/2RR-08 | AATTGGGGATCTTGAAGTTCCT | GATGGCGTAAATCGTGGTA | Flank1 *aacC1* in mutant alleles of G08 |
| 1LF-08/1RR-08 | CAACTTTAGCGATTTCTGG | CTTTAGCAAACATGACCTACC | Flank2 *aacC1* in mutant alleles of G08 |
| 2LF-62/2RR-62 | TACACCCGGGTTAATCGT | GCGCTTCAAAATCTGATGTA | Flank1 *aacC1* in mutant alleles of G62 |
| 1LF-62/1RR-62 | GCGTATATTTTGTTTCCATTC | GACCTTTCTTATCACAACGA | Flank2 *aacC1* in mutant alleles of G62 |

**Figure S1.** Standard curves for the qPCR. The log dilutions of DNA are plotted versus the cycle threshold (Ct) values. The equation of the regression line and its R2 values are displayed in the upper right corner of each graph. For each qPCR assay a standard curve was generated using four 5-fold dilutions of gDNA. All these assays were conducted in *A. baumannii* background (primer pairs used in these curves are: (A)16S-F/R, (B) gyrB-F/R (C) G08-EXC F/R, (D) G08-JUN F/R, (E) G62-JUN F/R, (E) G62-EXC F/R (Listed in table S1).
